# Supplementary material for: Chemical diversity of Brittonodoxa subpinnata , a Brazilian native species of moss
Source: Royal Society of Chemistry journal article supplement (doi:10.1039/d3mo00209h), 2024-01-23
Supplement: d3mo00209h1.pdf [file d3mo00209h1.pdf]

The datasets generated and analyzed during the current study are available in the GNPS repository:

The polar analysis is available at:

<http://gnps.ucsd.edu/ProteoSAFe/status.jsp?task=6022f173aa414709b62653acf2cbfddc>

and the library search at:

<https://gnps.ucsd.edu/ProteoSAFe/status.jsp?task=734071ebc1a44cf5917cf8a30e60a124>

The non-polar analysis is available at:

<http://gnps.ucsd.edu/ProteoSAFe/status.jsp?task=7b92743ac5f549029e9f920f1d97eb18>

and the library search at:

<http://gnps.ucsd.edu/ProteoSAFe/status.jsp?task=2daf940884994747ad4fba3da1c73ff2>

The intracellular and Cell wall analysis is available at:

<https://gnps.ucsd.edu/ProteoSAFe/status.jsp?task=62d964cb9d88411c8979dc99e0303296>

The raw data files analyzed during the current study are available in the MASSIVE repository:

Polar extracts: **MSV000093495** ([doi:10.25345/C5HM52W36](https://doi.org/10.25345/C5HM52W36))

Non-polar extracts: **MSV000093496** ([doi:10.25345/C5CV4C29V](https://doi.org/10.25345/C5CV4C29V))

Soluble (Intracellular) extract: **MSV000093497** ([doi:10.25345/C5833N86H](https://doi.org/10.25345/C5833N86H))

Insoluble (Cell-wall) extract: **MSV000093498** ([doi:10.25345/C54F1MV65](https://doi.org/10.25345/C54F1MV65))
