# Supplementary material for: Chemical diversity of Brittonodoxa subpinnata , a Brazilian native species of moss
Source: Royal Society of Chemistry journal article supplement (doi:10.1039/d3mo00209h), 2024-01-23
Supplement: d3mo00209h2.pdf [file d3mo00209h2.pdf]

**Table S1.** Compounds detected by GC-MS in the polar phase of *Brittonodoxa subpinnata*, and their respective Cosine and Linear Retention Index (LRI) calculated by GNPS and from the databases used in their annotation, Golm metabolome database (GMD), NIST and European Mass bank.

| Peak                 | Rt (s) | Compound                     | Cosine (GNPS) | LRI  | LRI (GMD) | LRI (Mass bank) | LRI (NIST) |
|----------------------|--------|------------------------------|---------------|------|-----------|-----------------|------------|
| <b>Polar extract</b> |        |                              |               |      |           |                 |            |
| 1                    | 679    | Hydroxylamine                | 0.80          | 1116 | 1105      | 1112            | -          |
| 2                    | 716    | Oxalic acid                  | 0.75          | 1133 | 1118      | 1125            | -          |
| 3                    | 747    | Dihydrouracil                | 0.88          | 1145 | -         | 1134            | -          |
| 4                    | 778    | Hydroxybutyric acid          | 0.83          | 1162 | -         | 1152            | -          |
| 5                    | 825    | 3-Methyl-2-oxovaleric acid   | 0.72          | 1188 | -         | 1191            | -          |
| 6                    | 857    | Malonic acid                 | 0.95          | 1206 | 1197      | 1193            | -          |
| 7                    | 872    | L-Norvaline                  | 0.96          | 1215 | 1229      | 1232            | -          |
| 8                    | 917    | Methylmalonic acid           | 0.89          | 1242 | -         | 1207            | -          |
| 9                    | 927    | Urea                         | 0.87          | 1248 | 1234      | 1238            | -          |
| 10                   | 932    | Benzoic acid                 | 0.83          | 1251 | -         | 1251            | -          |
| 11                   | 964    | 3-aminopropionitrile         | 0.89          | 1270 | 1261      | 1271            | -          |
| 12                   | 977    | L-Proline                    | 0.72          | 1283 | 1295      | 1294            | -          |
| 13                   | 1002   | L-Isoleucine                 | 0.90          | 1292 | 1286      | 1287            | -          |
| 14                   | 1013   | Nicotinic acid               | 0.83          | 1299 | 1301      | 1295            | -          |
| 15                   | 1042   | Succinic acid                | 0.92          | 1317 | 1311      | 1303            | -          |
| 16                   | 1078   | Uracil                       | 0.67          | 1339 | 1335      | 1332            | -          |
| 17                   | 1106   | L-Serine                     | 0.80          | 1357 | 1351      | 1348            | -          |
| 18                   | 1112   | L-Alanine                    | 0.88          | 1360 | 1360      | -               | -          |
| 19                   | 1151   | L-Threonine                  | 0.87          | 1384 | 1377      | 1375            | -          |
| 20                   | 1216   | DL-2,3-Diaminopropionic acid | 0.80          | 1425 | 1403      | 1399            | -          |
| 21                   | 1310   | Malic acid                   | 0.82          | 1486 | 1479      | 1476            | -          |
| 22                   | 1360   | L-5-Oxoproline               | 0.96          | 1519 | 1521      | 1519            | -          |
| 23                   | 1367   | GABA                         | 0.92          | 1524 | 1527      | 1527            | -          |
| 24                   | 1498   | L-Glutamic acid              | 0.86          | 1616 | 1614      | 1607            | -          |
| 25                   | 1505   | L-Phenylalanine              | 0.96          | 1622 | 1629      | 1625            | -          |
| 26                   | 1567   | L-Asparagine                 | 0.72          | 1668 | 1666      | 1661            | -          |
| 27                   | 1672   | Aconitic acid                | 0.87          | 1748 | 1741      | 1737            | -          |
| 28                   | 1746   | Shikimic acid                | 0.88          | 1805 | 1795      | 1792            | -          |
| 29                   | 1756   | Citric acid                  | 0.97          | 1811 | 1804      | 1804            | -          |
| 30                   | 1774   | L-Iditol                     | 0.90          | 1826 | -         | 1829            | -          |
| 31                   | 1800   | Mannitol                     | 0.70          | 1857 | 1913      | 1908            | -          |
| 32                   | 1807   | D-Fructose <sup>1</sup>      | 0.97          | 1862 | 1853      | 1854            | -          |
| 33                   | 1819   | D-Fructose <sup>1</sup>      | 0.99          | 1871 | 1863      | 1864            | -          |
| 34                   | 1828   | D-Glucose <sup>2</sup>       | 0.89          | 1878 | 1880      | 1882            | -          |
| 35                   | 1837   | D-Mannose                    | 0.90          | 1886 | 1885      | 1888            | -          |
| 36                   | 1858   | D-Glucose <sup>2</sup>       | 0.93          | 1904 | 1900      | 1902            | -          |
| 37                   | 1866   | D-Galactose                  | 0.83          | 1910 | 1902      | 1899            | -          |
| 38                   | 1876   | L-Iditol                     | 0.90          | 1903 | -         | 1900            | -          |
| 39                   | 1914   | L-Ascorbic acid              | 0.83          | 1939 | 1937      | -               | -          |
| 40                   | 1962   | Chiro-Inositol               | 0.83          | 1983 | 1951      | 1973            | -          |
| 41                   | 1998   | Scyllo-Inositol              | 0.91          | 2016 | 2027      | -               | -          |
| 42                   | 2067   | Myo-Inositol                 | 0.95          | 2077 | 2080      | 2075            | -          |
| 43                   | 2013   | Uric acid                    | 0.50          | 2093 | 2094      | 2088            | -          |
| 44                   | 2168   | Phytol                       | 0.92          | 2172 | 2171      | 2168            | -          |
| 45                   | 2245   | Stearic acid                 | 0.88          | 2245 | -         | 2236            | -          |
| 46                   | 2603   | Sucrose <sup>3</sup>         | 0.95          | 2613 | 2623      | 2614            | -          |
| 47                   | 2609   | Sucrose <sup>3</sup>         | 0.97          | 2621 | 2623      | 2614            | -          |
| 48                   | 2670   | $\alpha$ -Lactose            | 0.89          | 2682 | 2670      | 2670            | -          |

Rt: retention time. LRI: linear retention index. GMD: Golm Metabolome Database.

-: linear retention index not found in the database.

NI: not identified. GABA: gamma-aminobutyric acid.

<sup>1</sup> Fructose stereoisomers produced by methoximation reaction.

<sup>2</sup> Glucose stereoisomers produced by methoximation reaction.

<sup>3</sup> Sucrose stereoisomers produced by methoximation reaction.

Table 1. - Continue

| Peak                     | Rt (sec) | Compound                             | Cosine | LRI  | LRI (GMD) | LRI (Mass bank) | LRI (NIST) |
|--------------------------|----------|--------------------------------------|--------|------|-----------|-----------------|------------|
| 49                       | 2681     | Maltose                              | 0.84   | 2706 | 2719      | 2718            | -          |
| 50                       | 2696     | D-Trehalose                          | 0.94   | 2723 | 2727      | 2726            | -          |
| 51                       | 2806     | Melibiose <sup>4</sup>               | 0.90   | -    | 2837      | 2839            | -          |
| 52                       | 2932     | Melibiose <sup>4</sup>               | 0.89   | -    | 2868      | 2872            | -          |
| 53                       | 2955     | Galactinol                           | 0.82   | -    | 2966      | -               | -          |
| <b>Non-polar extract</b> |          |                                      |        |      |           |                 |            |
| 54                       | 570      | <i>o</i> -Toluic acid                | 0.80   | 1354 | 1359      | 1326            | -          |
| 55                       | 723.6    | Capric acid (C10:0)                  | 0.82   | 1452 | -         | 1456            | -          |
| 56                       | 768.6    | 3,4-Dimethylbenzoic acid             | 0.75   | 1482 | -         | -               | 1493       |
| 57                       | 816.6    | 2,4-Di-tert-butylphenol              | 0.74   | 1515 | -         | -               | 1525       |
| 58                       | 928.2    | Hexadecane (C <sub>16</sub> )        | 0.75   | 1591 | -         | -               | 1600       |
| 59                       | 1004.4   | Lauric acid (C12:0)                  | 0.84   | 1647 | 1654      | -               | -          |
| 60                       | 1062     | Heptadecane (C <sub>17</sub> )       | 0.83   | 1689 | -         | -               | 1700       |
| 61                       | 1134.6   | Tridecanoic acid (Internal Standard) |        |      |           |                 |            |
| 62                       | 1159.2   | Tetradecanol (C <sub>14</sub> )      | 0.86   | 1764 | 1760      | -               | 1754       |
| 63                       | 1167     | Octadecene (C <sub>18</sub> )        | 0.90   | 1770 | -         | -               | 1795       |
| 64                       | 1186.2   | Glycerol 1-phosphate                 | 0.83   | 1785 | -         | 1740            | -          |
| 65                       | 1198.8   | Azelaic acid                         | 0.79   | 1794 | 1790      | -               | 1788       |
| 66                       | 1216.8   | Octadecane (C <sub>18</sub> )        | 0.78   | 1808 | -         | -               | 1800       |
| 67                       | 1237.8   | 11-Tetradecen-1-ol, acetate          | 0.84   | 1824 | -         | -               | 1810       |
| 68                       | 1246.8   | Pentadecanol (C <sub>15</sub> )      | 0.81   | 1831 | 1860      | -               | -          |
| 69                       | 1249.2   | Glucose                              | 0.88   | 1833 | -         | 1851            | 1844       |
| 70                       | 1255.8   | Myristic acid (C14:0)                | 0.76   | 1838 | 1845      | -               | 1850       |
| 71                       | 1318.2   | Nonadecene (C <sub>19</sub> )        | 0.86   | 1886 | -         | -               | 1894       |
| 72                       | 1356.6   | Nonadecane (C <sub>19</sub> )        | 0.82   | 1918 | -         | -               | 1900       |
| 73                       | 1372.8   | Pentadecanoic acid (C15:0)           | 0.79   | 1934 | 1945      | -               | -          |
| 74                       | 1407     | Eicosene (C <sub>20</sub> )          | 0.82   | 1966 | -         | -               | 1997       |
| 75                       | 1414.2   | Hexadecanol (C <sub>16</sub> )       | 0.84   | 1973 | 1958      | -               | -          |
| 76                       | 1432.8   | Eicosane (C <sub>20</sub> )          | 0.87   | 1990 | -         | -               | 2000       |
| 77                       | 1453.8   | Palmitoleic acid (C16:1)             | 0.77   | 2010 | -         | 2024            | 2030       |
| 78                       | 1483.8   | Palmitic acid (C16:0)                | 0.93   | 2036 | 2045      | 2038            | -          |
| 79                       | 1554     | Heneicosane (C <sub>21</sub> )       | 0.80   | 2098 | -         | -               | 2100       |
| 80                       | 1569     | Isophytol                            | 0.77   | 2112 | 2170      | 2168            | 2122       |
| 81                       | 1626.6   | Phytol                               | 0.94   | 2167 | 2170      | 2168            | 2122       |
| 82                       | 1646.4   | Octadecanol (C <sub>18</sub> )       | 0.83   | 2185 | 2152      | -               | -          |
| 83                       | 1657.8   | Linoleic acid ethyl ester            | 0.76   | 2196 | -         | -               | 2173       |
| 84                       | 1664.4   | Oleic acid (C18:1)                   | 0.92   | 2202 | 2217      | 2225            | -          |
| 85                       | 1672.2   | Elaidic acid (C18:1)                 | 0.77   | 2210 | -         | 2223            | -          |
| 86                       | 1687.2   | Nonadecanol (C <sub>19</sub> )       | 0.84   | 2224 | 2252      | -               | -          |
| 87                       | 1693.8   | Stearic acid (C18:0)                 | 0.93   | 2231 | 2243      | 2236            | -          |
| 88                       | 1731     | Pimaric acid                         | 0.71   | 2266 | -         | -               | 2287       |
| 89                       | 1753.2   | Linoleic acid (C18:2)                | 0.82   | 2288 | -         | 2267            | 2218       |

Rt: retention time. LRI: linear retention index. GMD: Golm Metabolome Database.

-: linear retention index not found in the database.

NI: not identified.

<sup>4</sup> Melibiose stereoisomers produced by methoximation reaction.

Table 1. – Continue

| Peak | Rt<br>(sec) | Compound                       | Cosine | LRI  | LRI<br>(GMD) | LRI<br>(Mass bank) | LRI<br>(NIST) |
|------|-------------|--------------------------------|--------|------|--------------|--------------------|---------------|
| 90   | 1812.6      | Arachidonic acid (C20:4)       | 0.84   | 2348 | 2383         | -                  | 2372          |
| 91   | 1827        | Juniperic acid                 | 0.78   | 2363 | 2386         | 2382               | -             |
| 92   | 1908        | Myo-Inositol 1-phosphate       | 0.78   | 2449 | 2414         | -                  | -             |
| 93   | 1913.4      | Retinol                        | 0.73   | 2455 | -            | -                  | 2454          |
| 94   | 1969.8      | Pentacosane (C <sub>25</sub> ) | 0.76   | 2516 | -            | -                  | 2500          |
| 95   | 1989        | Docosanol (C <sub>22</sub> )   | 0.77   | 2537 | -            | -                  | 2549          |
| 96   | 2035.8      | 1-monopalmitin                 | 0.76   | 2589 | -            | -                  | 2606          |
| 97   | 2106        | Heptacosene (C <sub>27</sub> ) | 0.82   | 2670 | -            | -                  | 2670          |
| 98   | 2129.4      | Alpha lactose                  | 0.85   | 2697 | 2670         | 2670               | -             |
| 99   | 2136.6      | Maltose                        | 0.83   | 2705 | 2718         | 2719               | -             |
| 100  | 2214        | Nervonic acid (C24:1)          | 0.85   | 2795 | 2815         | -                  | 2745          |
| 101  | 2220.6      | Squalene                       | 0.90   | 2803 | -            | -                  | 2823          |
| 102  | 2235.6      | Lignoceric acid (C24:0)        | 0.74   | 2821 | 2834         | -                  | 2838          |
| 103  | 2243.4      | Maltitol                       | 0.73   | 2831 | 2811         | 2807               | -             |
| 104  | 2273.4      | Octacosene (C <sub>28</sub> )  | 0.83   | 2868 | -            | -                  | 2873          |
| 105  | 2358        | Guanosine                      | 0.71   | 2971 | 2761         | 2929               | -             |
| 106  | 2392.8      | Cerotic acid (C26:0)           | 0.77   | 3014 | 3036         | -                  | -             |
| 107  | 2473.2      | Alpha-tocopherol               | 0.88   | 3121 | 3160         | 3152               | 3149          |
| 108  | 2541        | Montanic acid (C28:0)          | 0.78   | 3210 | 3232         | -                  | 3232          |
| 109  | 2551.8      | Epicampesterol                 | 0.90   | 3224 | 3188         | -                  | 3145          |
| 110  | 2559        | β-sitosterol                   | 0.73   | 3233 | -            | -                  | 3203          |
| 111  | 2615.4      | Stigmasterol                   | 0.78   | 3304 | 3319         | -                  | 3286          |
| 112  | 2641.8      | 12-Oleanen-3-yl acetate        | 0.82   | 3337 | -            | -                  | 3339          |
| 113  | 2656.8      | Lanosterol                     | 0.75   | 3356 | 3390         | -                  | 3375          |
| 114  | 2697.6      | Alpha-spinasterol acetate      | 0.72   | 3407 | -            | -                  | 3353          |

Rt: retention time. LRI: linear retention index. GMD: Golm Metabolome Database.

-: linear retention index not found in the database.

NI: not identified.
