# Supplementary material for: Chemical diversity of Brittonodoxa subpinnata , a Brazilian native species of moss
Source: Royal Society of Chemistry journal article supplement (doi:10.1039/d3mo00209h), 2024-01-23
Supplement: d3mo00209h3.pdf [file d3mo00209h3.pdf]

**Table S2.** Metabolites detected by HPLC-MS<sup>2</sup> in the soluble (SE) and the insoluble extracts (IE) of *Brittonodoxa subpinnata*. The mark (X) in each column indicates in which extract the compound is present; the presence of double mark (XX) indicates the compound is present in the respective extract in more than ¾ of the total in both extracts.

| N° | Rt (min) | Annotation                                | [M-H] <sup>-</sup> | MS <sup>2</sup>                               | SE | IE | Reference for annotation      |
|----|----------|-------------------------------------------|--------------------|-----------------------------------------------|----|----|-------------------------------|
| 1  | 4.25     | Asparagine                                | 131                | 113; 101; 95                                  | XX | X  | (Ragheb et al., 2021)         |
| 2  | 4.37     | Maltooctaose                              | 1313               | 1133; 1031; 869; 707; 545; 502; 485; 443; 382 | X  | X  | Frag. Pattern                 |
| 3  | 4.41     | Maltononaose                              | 1475               | 1295; 1193; 1133; 1031; 869; 707; 545         | X  | X  | Frag. Pattern                 |
| 4  | 4.46     | Isomaltononaose                           | 1476               | 1295; 1193; 1133; 1031; 869; 707; 545         | X  | X  | Frag. Pattern                 |
| 5  | 4.47     | Maltoheptaose                             | 1151               | 971; 869; 809; 707; 545; 383                  | X  | X  | Frag. Pattern                 |
| 6  | 4.58     | Verbascose                                | 827                | 759; 647; 545; 383                            | XX | X  | Frag. Pattern                 |
| 7  | 4.59     | Stachyose                                 | 665                | 485; 383; 341; 220                            | XX | X  | (Sawada et al., 2009)         |
| 8  | 4.60     | Maltohexaose                              | 989                | 809; 707; 647; 545; 383                       | XX | X  | Frag. Pattern                 |
| 9  | 4.63     | D-Gluconic acid                           | 195                | 177; 159; 129; 99; 75                         | X  | X  | (Allamberganova et al., 2022) |
| 10 | 4.72     | Ribonic acid                              | 165                | 147; 129; 97; 75                              | XX | X  | Massbank                      |
| 11 | 4.73     | 3,4,5-Trihydroxycinnamic acid-3'-hexoside | 357                | 329; 219; 195; 167; 149; 125                  | X  | X  | (Zhang et al., 2015)          |
| 12 | 4.75     | Sucrose                                   | 341                | 179; 161; 143; 113                            | XX | X  | (Ragheb et al., 2021)         |
| 13 | 4.76     | Citric acid                               | 191                | 173; 111                                      | XX | X  | (Ragheb et al., 2021)         |
| 14 | 4.92     | Protochatechuic acid                      | 153                | 125; 109; 107                                 | XX | X  | (Zhang et al., 2015)          |
| 15 | 5.36     | Raffinose                                 | 503                | 341; 322; 221; 179; 161; 143                  | XX | X  | GNPS                          |
| 16 | 5.82     | 3,4,5-Trihydroxycinnamic acid-3'-hexoside | 357                | 329; 219; 195; 167; 149; 125                  | X  | X  | (Zhang et al., 2015)          |
| 17 | 5.88     | Catechin 7-O-glucopyranoside              | 451                | 423; 331; 289; 151                            | X  | XX | (Kang et al., 2016)           |
| 18 | 5.91     | Quinic acid                               | 191                | 171; 111                                      | XX | X  | (Zhang et al., 2015)          |
| 19 | 5.96     | Homogentisate                             | 167                | 151; 149; 139; 125; 123                       | X  | XX | GNPS                          |
| 20 | 5.98     | Luteolin-6,8-di-C-hexopyranoside          | 609                | 591; 519; 489; 399; 369; 285                  | X  | X  | (Zhang et al., 2015)          |
| 21 | 6.00     | Rhamnetin 3-O-hexopyranoside              | 477                | 445; 357; 339; 325; 315; 297; 283             | XX | X  | Frag. Pattern                 |
| 22 | 6.18     | Gentisic acid                             | 153                | 137; 123; 109                                 | XX | X  | GNPS                          |
| 23 | 6.25     | Sinapic acid                              | 223                | 193; 179; 163; 151                            | XX | X  | (Díaz-Rivas et al., 2018)     |
| 24 | 6.26     | Possible flavonoid                        | 275                | 257; 231; 151                                 | X  | XX | GNPS                          |
| 25 | 6.53     | Tricetin                                  | 301                | 273; 257; 193; 179; 151                       | X  | X  | (Kang et al., 2016)           |
| 26 | 7.56     | Octadecatetraenoic acid                   | 275                | 257; 231; 151                                 | X  | XX | GNPS                          |

Table 2. – continue

| N° | Rt (min) | Annotation                                        | [M-H] <sup>-</sup> | MS <sup>2</sup>                                  | SE | IE | Reference for annotation          |
|----|----------|---------------------------------------------------|--------------------|--------------------------------------------------|----|----|-----------------------------------|
| 27 | 7.91     | Prunin                                            | 433                | 373; 369; 313; 295; 271                          | XX | X  | (Kang et al., 2016)               |
| 28 | 7.98     | Taxifolin 3- <i>O</i> -hexopyranoside             | 465                | 303; 270                                         | XX | X  | (Kang et al., 2016)               |
| 29 | 7.99     | 5,7,3',4',5'-Pentahydroxyflavanone                | 303                | 271; 227; 179; 151                               | X  |    | GNPS                              |
| 30 | 8.16     | Orobol-4'- <i>O</i> -hexopyranoside               | 447                | 327; 285                                         | XX | X  | Frag. Pattern                     |
| 31 | 8.29     | Isorhamnetin-3- <i>O</i> -hexopyranoside          | 477                | 445; 357; 315; 283                               | XX | X  | (Kang et al., 2016)               |
| 32 | 9.23     | Selgin                                            | 315                | 300; 283; 271; 256; 229                          | X  |    | Frag. Pattern                     |
| 33 | 9.24     | Hovenodulinol-3- <i>O</i> -hexopyranoside         | 509                | 347; 315                                         | XX | X  | Frag. Pattern                     |
| 34 | 9.42     | Epicatechin-5- <i>O</i> -hexopyranosyl-3-benzoate | 555                | 537; 435; 417; 393; 361                          | XX | X  | (Hwang et al., 2001)              |
| 35 | 9.47     | <i>p</i> -Hydroxymandelic acid                    | 167                | 151; 139; 125; 123                               | X  | XX | GNPS                              |
| 36 | 10.06    | Rhamnetin 3- <i>O</i> -hexopyranoside             | 477                | 445; 357; 328. 325; 315; 283                     | XX | X  | Frag. Pattern                     |
| 37 | 10.15    | Isorhamnetin                                      | 315                | 300; 287; 284; 283; 271; 256; 229                | X  |    | (Kang et al., 2016)               |
| 38 | 10.57    | Orobol-7- <i>O</i> -hexopyranoside                | 447                | 327; 285                                         | XX | X  | Frag. Pattern                     |
| 39 | 10.83    | Fisetin                                           | 285                | 267; 257; 241; 229; 217; 175; 151; 137; 125; 109 | X  | X  | Massbank and (Fabre et al., 2001) |
| 40 | 10.87    | 3-Hydroxyphenyl acetic acid                       | 151                | 123; 107; 83; 65                                 | X  | X  | GNPS                              |
| 41 | 11.12    | Dihydroxyringtonin-3- <i>O</i> -hexoside          | 509                | 341; 315; 283                                    | X  |    | Frag. Pattern                     |
| 42 | 11.98    | Orobol                                            | 285                | 267; 257; 241; 229; 217; 175; 151                | X  | X  | Frag. Pattern                     |
| 43 | 12.62    | Diosmetin                                         | 299                | 284; 231; 147                                    | X  | X  | (Zou et al., 2015)                |
| 44 | 12.65    | Isorhamnetin-3- <i>O</i> -hexopyranoside          | 477                | 445; 357; 325; 315; 283                          | XX | X  | Frag. Pattern                     |
| 45 | 12.99    | Rhamnetin                                         | 315                | 300; 284; 271; 256; 229                          | X  |    | Frag. Pattern                     |
| 46 | 14.18    | Biochanin A                                       | 283                | 265; 255; 239; 227; 211; 151                     | XX | X  | (Hossain et al., 2010)            |
| 47 | 20.23    | Luteolin                                          | 285                | 267; 257; 241; 229; 213; 177; 151; 121           | X  | X  | (Kang et al., 2016)               |
| 48 | 20.86    | Tetrahydroxyheptadecenoic acid                    | 331                | 313; 295; 171; 157; 127                          |    | X  | GNPS                              |
| 49 | 21.74    | Tetrahydroxyoctadecenoic acid                     | 345                | 327; 309; 265; 247                               |    | X  | (Kang et al., 2016)               |
| 50 | 22.18    | Ferulic acid                                      | 193                | 178; 149; 133                                    |    | X  | (Díaz-Rivas et al., 2018)         |
| 51 | 22.59    | Trihydroxyoctadecenoic acid                       | 329                | 311; 293; 229; 211; 171                          | X  | XX | (Ragheb et al., 2021)             |

Table 2. – continue

| N° | Rt (sec) | Annotation                                                                        | [M-H] <sup>-</sup> | MS <sup>2</sup>                   | SE | IE | Reference for annotation  |
|----|----------|-----------------------------------------------------------------------------------|--------------------|-----------------------------------|----|----|---------------------------|
| 52 | 23.19    | 5'-Hydroxyamentoflavone                                                           | 555                | 537; 429; 403; 385; 377           |    | X  | Frag. Pattern             |
| 53 | 23.98    | Dihydrosinapic acid                                                               | 225                | 207; 197; 181; 119; 93            |    | X  | Frag. Pattern             |
| 54 | 24.08    | Dihydroxy benzoic acid- <i>O</i> -hexoside                                        | 315                | 297; 271; 189; 163; 151; 107      |    | X  | (Ragheb et al., 2021)     |
| 55 | 24.38    | 2,3-Dihydrobiapigenin (isomer A)                                                  | 539                | 495; 413; 387; 361; 177           |    | X  | (Caldas et al., 2019)     |
| 56 | 24.44    | <i>p</i> -Coumaric acid                                                           | 163                | 135; 119                          |    | X  | (Ragheb et al., 2021)     |
| 57 | 24.53    | Trihydroxyoctadecenoic acid                                                       | 329                | 311; 293; 229; 211; 171           | X  | X  | (Ragheb et al., 2021)     |
| 58 | 24.55    | Fukugetin                                                                         | 555                | 513; 429; 403; 385; 377           |    | X  | GNPS                      |
| 59 | 25.24    | Dihydrokaempferol                                                                 | 287                | 269; 241; 155; 127                |    | X  | (Kang et al., 2016)       |
| 60 | 25.97    | 2,3-Dihydrobiapigenin (isomer B)                                                  | 539                | 521; 495; 413; 387; 361           |    | X  | (Caldas et al., 2019)     |
| 61 | 26.69    | Octadecadienoic acid (isomer A)                                                   | 279                | 261; 246; 237; 233                |    | X  | GNPS                      |
| 62 | 27.00    | Octadecadienoic acid (isomer B)                                                   | 279                | 261; 246; 237; 217                |    | X  | GNPS                      |
| 63 | 27.10    | 3a-Hydroxy-3,5a,9-trimethyl-3,4,5,6,7,9b-hexahydrobenzo[g][1]benzofuran-2,8-dione | 263                | 263; 245; 235; 219                |    | X  | GNPS                      |
| 64 | 28.65    | 2,3-Dihydrobiapigenin (isomer C)                                                  | 539                | 495; 413; 387; 361; 177           |    | X  | (Caldas et al., 2019)     |
| 65 | 30.26    | 3a-Hydroxy-3,5a,9-trimethyl-3,4,5,6,7,9b-hexahydrobenzo[g][1]benzofuran-2,8-dione | 263                | 263; 245; 219; 217                |    | X  | GNPS                      |
| 66 | 30.58    | Binaringenin (isomer A)                                                           | 541                | 415; 389; 363; 177                |    | X  | (Yao et al., 2017)        |
| 67 | 30.91    | Binaringenin (isomer B)                                                           | 541                | 415; 389; 363; 177                |    | X  | (Yao et al., 2017)        |
| 68 | 33.08    | Dihydroxyoctadecadienoic acid                                                     | 311                | 293; 275; 201; 171                |    | X  | Frag. Pattern             |
| 69 | 37.19    | Dihydroxyoctadecenoic acid                                                        | 313                | 295; 277; 201; 171                |    | X  | GNPS                      |
| 70 | 37.41    | Caffeic acid                                                                      | 179                | 151; 135; 111; 93                 |    | X  | (Díaz-Rivas et al., 2018) |
| 71 | 37.67    | LPC 18:2                                                                          | 504                | 279; 243; 224                     |    | X  | GNPS                      |
| 72 | 44.31    | Canrenone                                                                         | 339                | 275; 268; 239; 225; 197; 183; 170 | XX | X  | GNPS                      |
| 73 | 45.97    | Nonadecanoic acid                                                                 | 297                | 268; 239; 233; 197; 183; 169      | X  | X  | Frag. Pattern             |
| 74 | 47.97    | Eicosanoic acid                                                                   | 311                | 268; 247; 239; 225; 211; 183; 169 |    | X  | (Perret et al., 2004)     |
| 75 | 50.64    | Behenic acid                                                                      | 339                | 275; 253; 239; 225; 212; 197; 169 | X  | X  | (Perret et al., 2004)     |
| 76 | 55.24    | Possible steroid                                                                  | 339                | 295; 275; 239; 183                | X  | XX | GNPS                      |
